# Supplementary material
Source: PubMed Central journal article supplement (PMC3501027)

**Supplement 1**

|         | ← Cytoplasmic Tail →      | ← Transmembrane Domain → |
|---------|---------------------------|--------------------------|
| hC2GnT1 | MLR <u>TLLRRRL</u> FSYPTK | YYFMVLVLSLITFSVLRIH      |
| cC2GnT1 | MLR <u>TLLRRRL</u> FSYPTK | YYFMVLVLSLITFSVLRIH      |
| dC2GnT1 | MLR <u>TLLRRRL</u> FSYPTK | YYCLLLVFSVVTFSVLRIH      |
| bC2GnT1 | MLR <u>KLWRRKL</u> FSFPTK | YYFLFLAFSVVTF'TVLRIH     |
| mC2GnT1 | MLR <u>NLFRRRL</u> FSCPTK | YYFMLLVLSLITFSVLRIH      |
| rC2GnT1 | MLR <u>NLFRRRL</u> FSYPTK | YYFMVLVLSLITFSVVRIH      |

Supplement 1. Alignment of the deduced amino acid sequences of C2GnT1 from human (*Homo sapiens*) (h), Chimpanzee (*Pan troglodytes*) (c), rat (*Rattus norvegicus*) (r), mouse (*Mus musculus*) (m), bovine (*Bos Taurus*) (b), and dog (*Canis lupus*) (d). Multiple sequence alignment was performed by Vector NTI 11 software. The accession numbers for these proteins are: hC2GnT1, (NP\_001481); cC2GnT1, (XP\_001145936); dC2GnT1, (XP\_541274); bC2GnT1, (NP\_803476); mC2GnT1, (NP\_775618); rC2GnT1, (NP\_071612). The amino acids predicted to be crucial for binding to GOLPH3 are underlined.

**Supplement 2**

**Table 1.** C2GnT1 cytoplasmic tail interactors identified by yeast two-hybrid screen <sup>a</sup>

| Class                | Identity | GenBank Accession | Occurrence <sup>b</sup> | Function                                                                                                |
|----------------------|----------|-------------------|-------------------------|---------------------------------------------------------------------------------------------------------|
| Protein transport    | CLTC     | NM_004859         | 1                       | Component of the clathrin coat, involved in the intracellular trafficking of receptors and endocytosis. |
|                      | GOLPH3   | NM_022130         | 2                       | Involved in mTOR signaling and maintenance of Golgi form.                                               |
|                      | SEC24D   | NM_014822         | 1                       | Component of the COPII coat.                                                                            |
|                      | VPS36    | NM_016075         | 1                       | Formation and sorting of endosomal cargo proteins.                                                      |
| Cytoskeleton binding | PARVA    | NM_018222         | 1                       | A member of the parvin family of actin-binding proteins.                                                |
|                      | STMN2    | NM_007029         | 1                       | Regulate microtubules instability.                                                                      |
| Protein folding      | CCT7     | NM_006429         | 1                       | A molecular chaperone that is a member of the chaperonin containing TCP1 complex.                       |
|                      | HSPA14   | NM_016299         | 1                       | Heat shock 70 kDa protein 14, a molecular chaperone.                                                    |
| Other                | CCDC80   | NM_199512         | 2                       | Coiled-coil domain containing protein.                                                                  |
|                      | LAP3     | NM_015907         | 8                       | Aminopeptidase that is involved in the regulation and turnover of several proteins.                     |
|                      | OSBPL1A  | NM_018030         | 1                       | Oxysterol binding protein, contains pleckstrin homology domain.                                         |
|                      | RSU1     | NM_012425         | 1                       | Plays a role in the Ras signal transduction pathway.                                                    |

<sup>a</sup> Human universal cDNA library was screened using a yeast-two-hybrid system. The bait was a Gal4-binding domain fused to a MLRTLLRRRLFSYPTKY peptide, which contains the C2GnT1 cytoplasmic tail. <sup>b</sup> Number of independent clones identified in the screen that encoded the same protein.

**Supplement 3.**

GOLPH3 depletion in KG1a cells does not alter the Golgi localization of C1GalT1 or ST3GALT1 and has no apparent effect on N- and O-Glycans as assessed by various lectins. A) Confocal immunofluorescence images of KG1a cells showing the colocalization of C1GalT1 (top) and ST3Gal1 (bottom) with the Golgi marker, Giantin after transfection with non-targeting (mock) or GOLPH3 siRNAs. B) FACS analysis of KG1a cells after labelling with fluorescein-labeled DSA, PNA, Jackalin or VVA lectin. Cells transfected with non-targeting siRNA (mock), dotted line; or GOLPH3 siRNA, solid line. DSA binds complex-type N-glycans, PNA binds nonsialylated core 1 O-glycan (T-antigen), Jackalin binds core 1 O-glycans, and VVA binds Tn antigen.

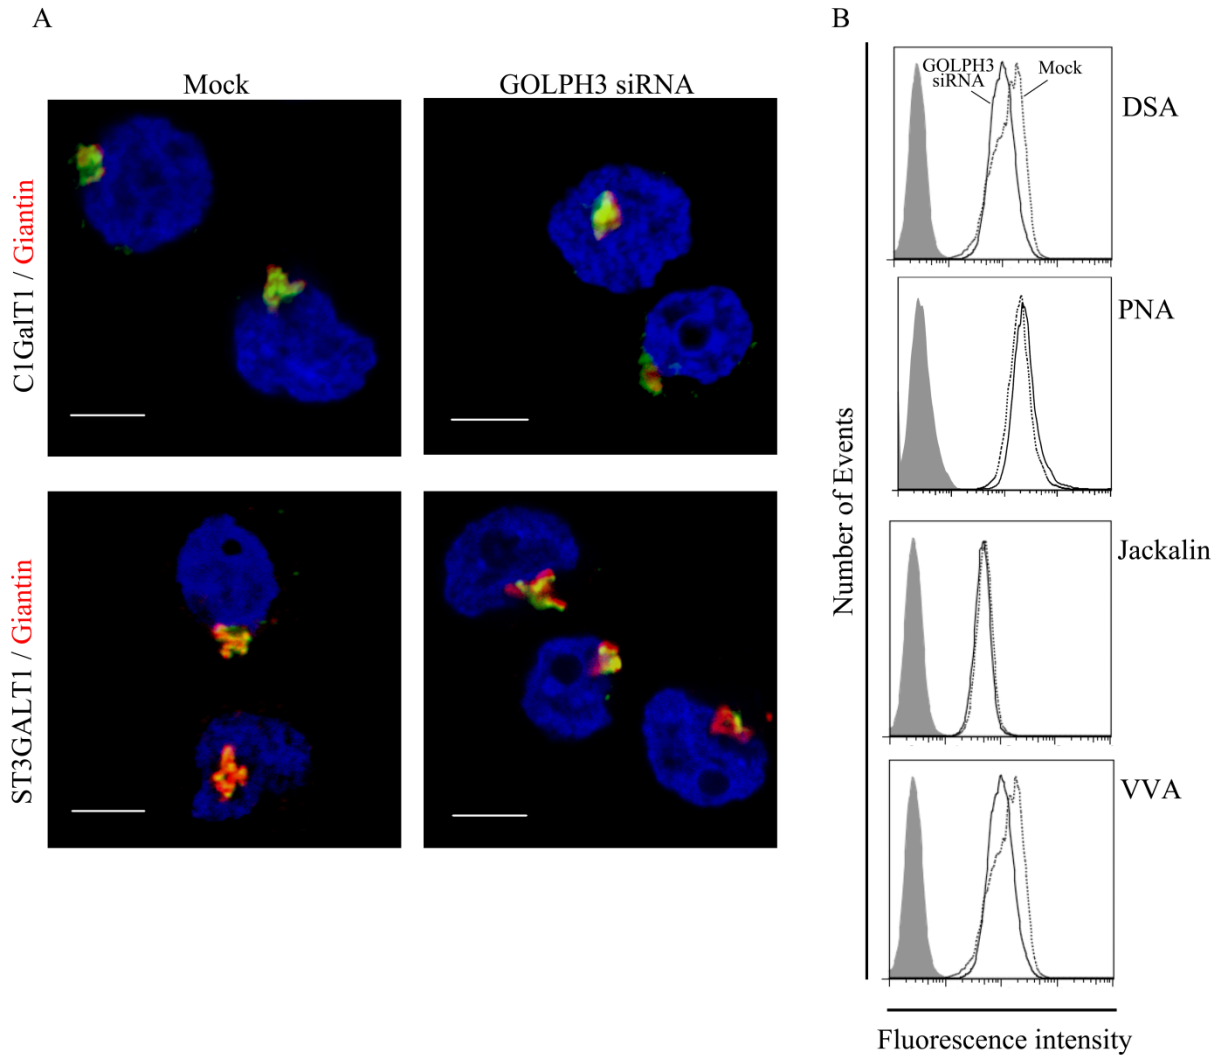

Supplement: supp_M112.346528_jbc.M112.346528-1.pdf [file supp_M112.346528_jbc.M112.346528-1.pdf]
